# Supplementary material for: Prenatal stress and child externalizing behavior: effects of maternal perceived stress and cortisol are moderated by child sex
Source: Springer Nature journal article supplement (doi:10.1186/s13034-023-00639-2), 2023-08-07
Supplement: MOESM1 [file 25895786]

## PRENATAL STRESS AND EXTERNALIZING BEHAVIOR

### Additional file Tables

Table S1: Pregnancy perceived stress with absent vs. present medical risk factors during pregnancy (Welch's test)

|                            | PSQ<br>Risk absent         |        | PSQ<br>Risk present |        | t     | Welch's df | p    |
|----------------------------|----------------------------|--------|---------------------|--------|-------|------------|------|
|                            | M                          | SD     | M                   | SD     |       |            |      |
|                            | Pregnancy complications t1 | 38.844 | 20.03               | 42.425 |       |            |      |
| Pregnancy complications t2 | 37.855                     | 19.14  | 40.873              | 19.83  | -.75  | 66.09      | .467 |
| Pregnancy complications t3 | 37.596                     | 19.93  | 43.536              | 18.50  | -1.55 | 89.48      | .125 |
| Alcohol consumption t1     | 39.596                     | 19.71  | 48.148              | 17.56  | -1.15 | 6.07       | .293 |
| Alcohol consumption t2     | 38.882                     | 19.52  | 38.334              | 3.92   | .15   | 4.69       | .879 |
| Alcohol consumption t3     | 40.130                     | 19.70  | 34.444              | 16.46  | .75   | 4.89       | .490 |
| Hospitalization t1         | 40.50                      | 19.95  | 37.89               | 18.64  | .42   | 11.76      | .683 |
| Hospitalization t2         | 38.91                      | 19.46  | 38.63               | 19.22  | .05   | 18.26      | .960 |
| Hospitalization t3         | 39.13                      | 19.94  | 41.97               | 18.47  | -.68  | 50.14      | .503 |

Note: t1 = 1<sup>st</sup> pregnancy trimester, t2 = 2<sup>nd</sup> pregnancy trimester, t3 = 3<sup>rd</sup> pregnancy trimester

Table S2: Pregnancy cortisol with absent vs. present medical risk factors during pregnancy (Welch's test)

|                            | Cortisol<br>Risk absent    |      | Cortisol<br>Risk present |      | t     | Welch's df | p    |
|----------------------------|----------------------------|------|--------------------------|------|-------|------------|------|
|                            | M                          | SD   | M                        | SD   |       |            |      |
|                            | Pregnancy complications t1 | 2.90 | 1.22                     | 2.88 |       |            |      |
| Pregnancy complications t2 | 2.81                       | 1.12 | 3.02                     | 1.05 | -.87  | 72.24      | .389 |
| Pregnancy complications t3 | 2.71                       | 1.19 | 3.08                     | .97  | -1.70 | 96.86      | .092 |
| Alcohol consumption t1     | 2.89                       | 1.15 | 2.86                     | .95  | .02   | 4.90       | .988 |
| Alcohol consumption t2     | 2.89                       | 1.13 | 2.51                     | .86  | .61   | 1.22       | .637 |
| Alcohol consumption t3     | 2.85                       | 1.13 | 2.97                     | 1.01 | -.19  | 2.31       | .812 |
| Hospitalization t1         | 2.92                       | 1.12 | 2.94                     | 1.13 | -.07  | 11.43      | .942 |
| Hospitalization t2         | 2.89                       | 1.14 | 2.86                     | 1.06 | .09   | 17.29      | .927 |
| Hospitalization t3         | 2.82                       | 1.17 | 2.95                     | .98  | -.55  | 52.95      | .581 |

Note: t1 = 1<sup>st</sup> pregnancy trimester, t2 = 2<sup>nd</sup> pregnancy trimester, t3 = 3<sup>rd</sup> pregnancy trimester
